# Supplementary material for: Recurrent PRDM10 Gene Fusions in Undifferentiated Pleomorphic Sarcoma
Source: Oxford University Press journal article supplement (doi:10.1158/1078-0432.ccr-14-2399), 2014-12-16
Supplement: 10780432ccr142399-sup-138008_1_supp_2725757_nvbchg.docx [file 10780432ccr142399-sup-138008_1_supp_2725757_nvbchg.docx]

**Supplementary Table S2.** Primers Used for Gene Fusion Verification and Sequencing

| Gene | Primer | Location | Sequence | Reference sequence |
| --- | --- | --- | --- | --- |
| MED12 | MED12-6259-F**a,c** | Exon 42 | CTGCAGCAGACACCCATGAT | **NM_005120.2** |
|  | MED12-5725-F | Exon 38 | CACCCAGAACCAGCCACTAC | **NM_005120.2** |
| CITED2 | CITED2-883-F**b** | Exon 2 | CTGCCGCCCAATGTCATAGA | **NM_006079.4** |
|  | CITED2-401-F | Exon 2 | TGGGCGAGCACATACACTAC | **NM_006079.4** |
| PRDM10 | PRDM10-1904-R**a** | Exon 13 | GAGATCACAGGTCAGTGGGC | **NM_020228.2** |
|  | PRDM10-2203-R**c** | Exon 14 | AGCATGTGGAGTCGCAGTTT | **NM_020228.2** |
|  | PRDM10-2391-R**b** | Exon 15 | ACGTGAAGCTGTCGTAGTCTG | **NM_020228.2** |
|  | PRDM10-3130-R | Exon 19 | GCTGAGGATCATGGAGCTGG | **NM_020228.2** |

**a** Primers that were used for sequencing of the *MED12-PRDM10* fusion in Case 1. **b** Primers that were used for sequencing of the the *CITED2-PRDM10* fusion in Case 2. **c** Primers that were used for sequencing of the the *MED12-PRDM10* fusion in Case 27.
