# Supplementary material for: Recurrent PRDM10 Gene Fusions in Undifferentiated Pleomorphic Sarcoma
Source: Oxford University Press journal article supplement (doi:10.1158/1078-0432.ccr-14-2399), 2014-12-16
Supplement: 10780432ccr142399-sup-138008_1_supp_2729609_n44bbb.docx [file 10780432ccr142399-sup-138008_1_supp_2729609_n44bbb.docx]

**Supplementary Figure 1.** Quantitative real-time PCR results for the 5'- and 3'-parts of *PRDM10* in a cohort of 80 soft tissue sarcomas. The *TBP* gene was used as endogenous control, and case No. 73 was used as calibrator. The three gene fusion-positive cases of undifferentiated pleomorphic sarcoma (Cases 1, 2, and 27) showed differential expression of the two parts of *PRDM10*).
